# Supplementary material
Source: PubMed Central journal article supplement (PMC3712499)

Figure S1 Yin

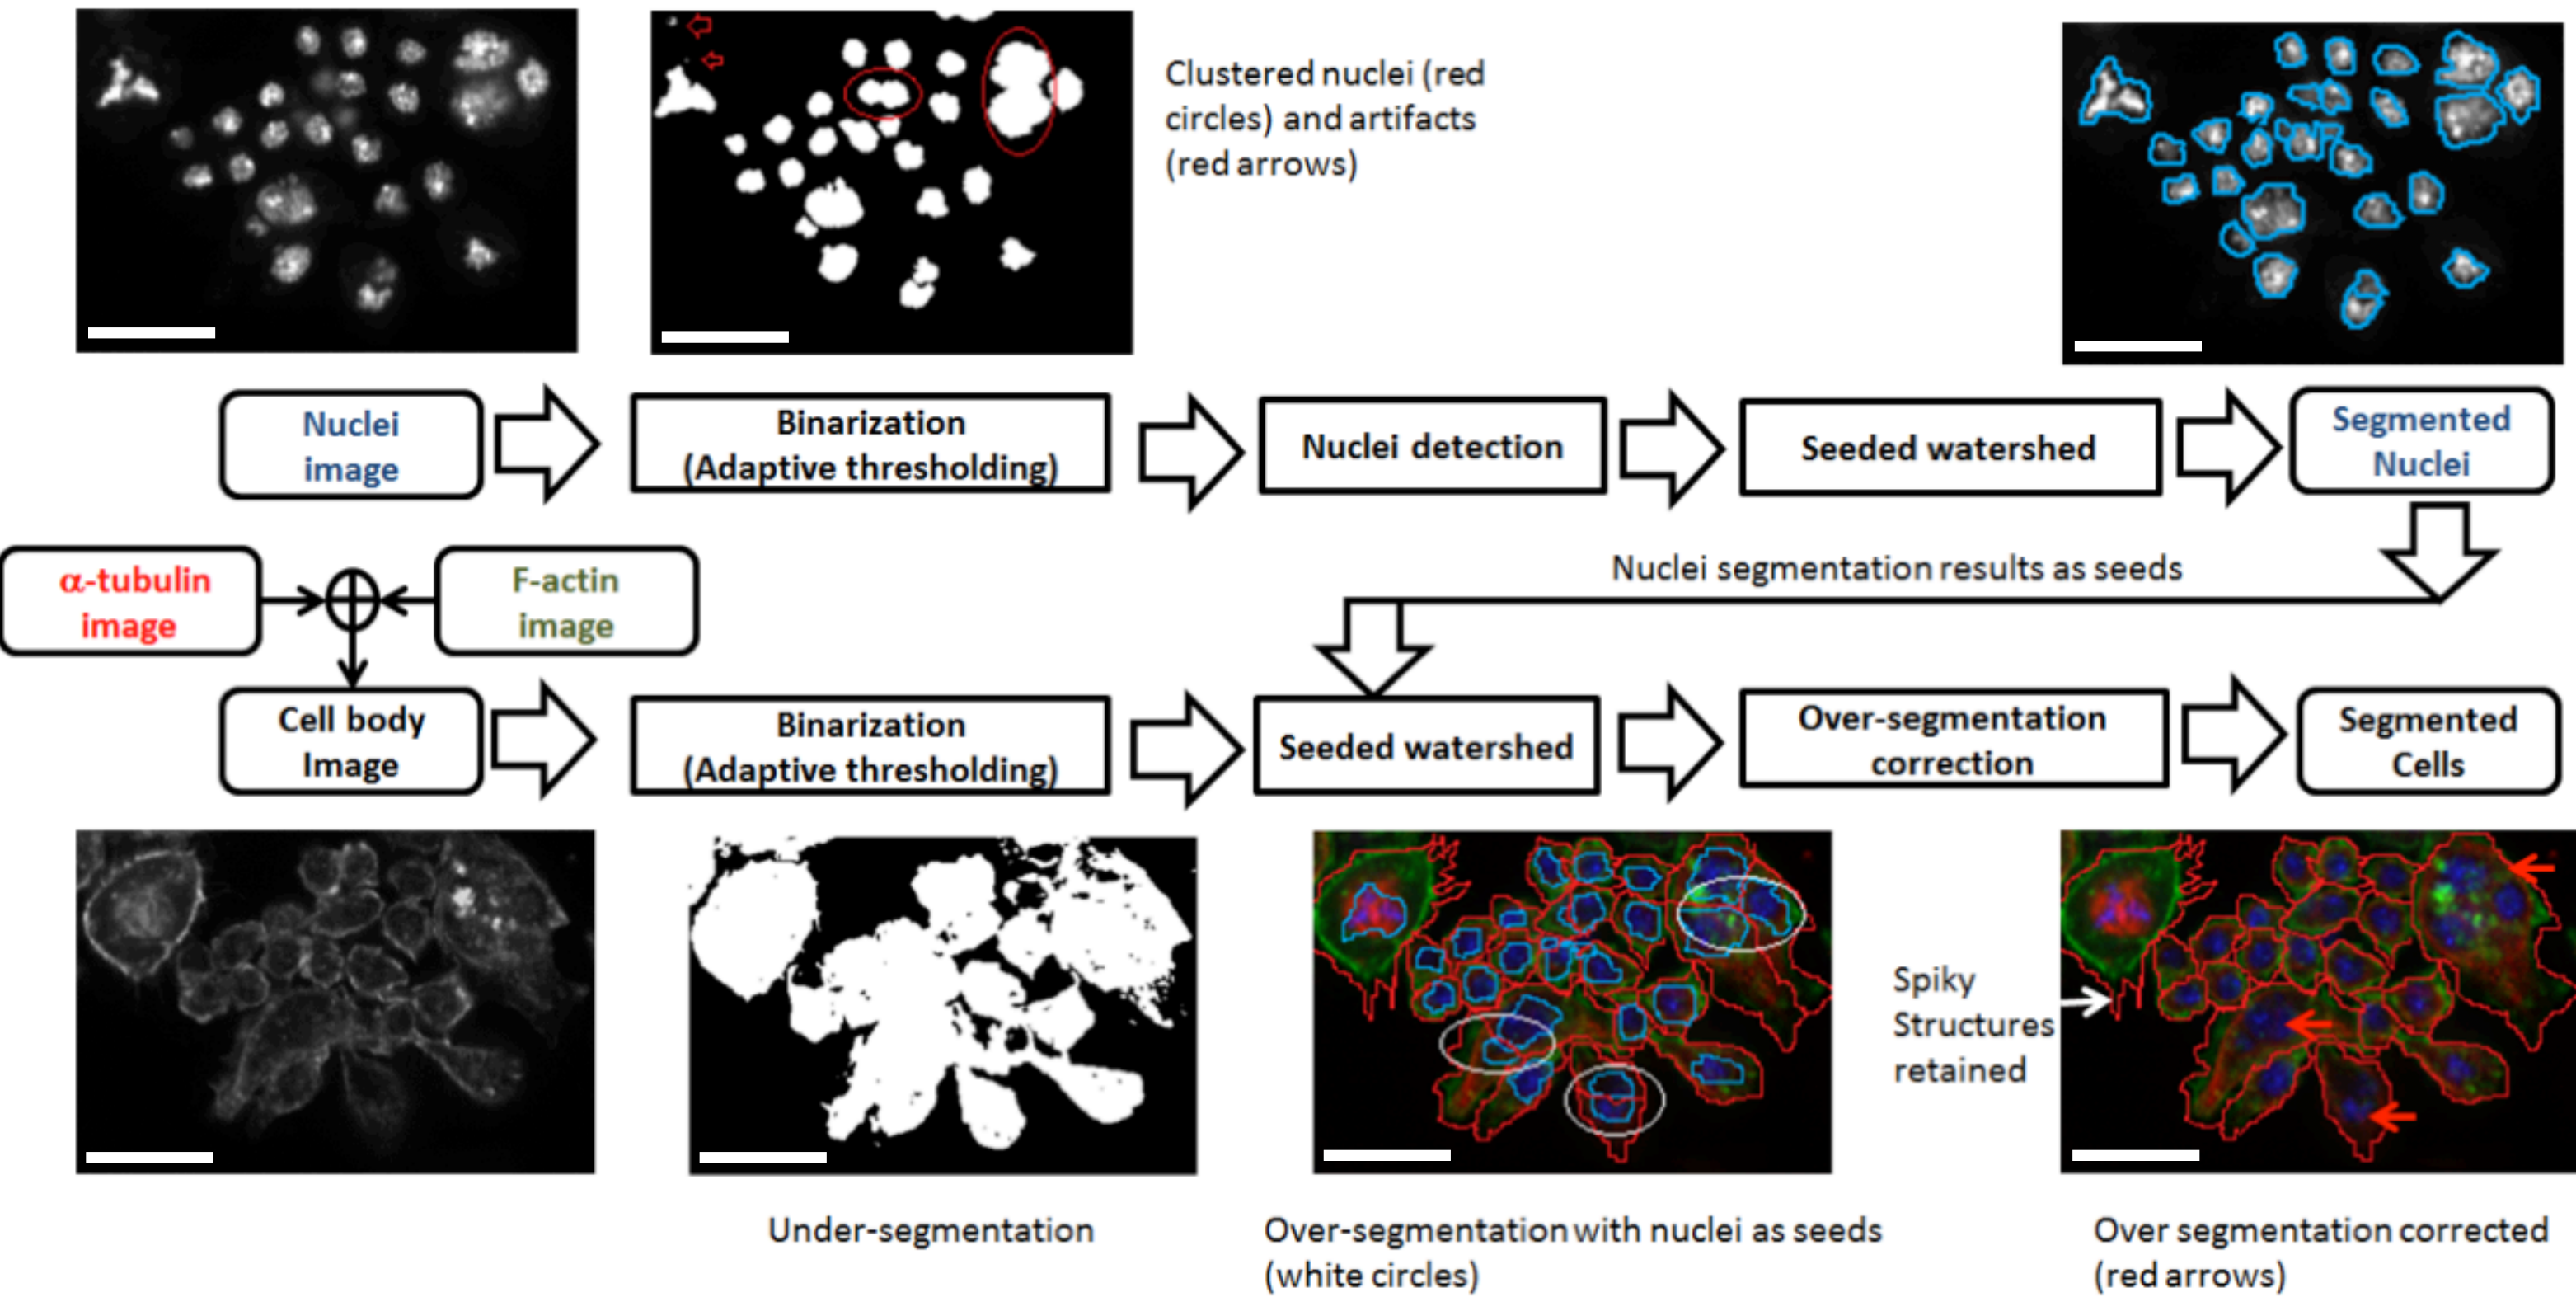

Supplement: NIHMS53734-supplement-3.pdf [file NIHMS53734-supplement-3.pdf]

Figure S4 Yin

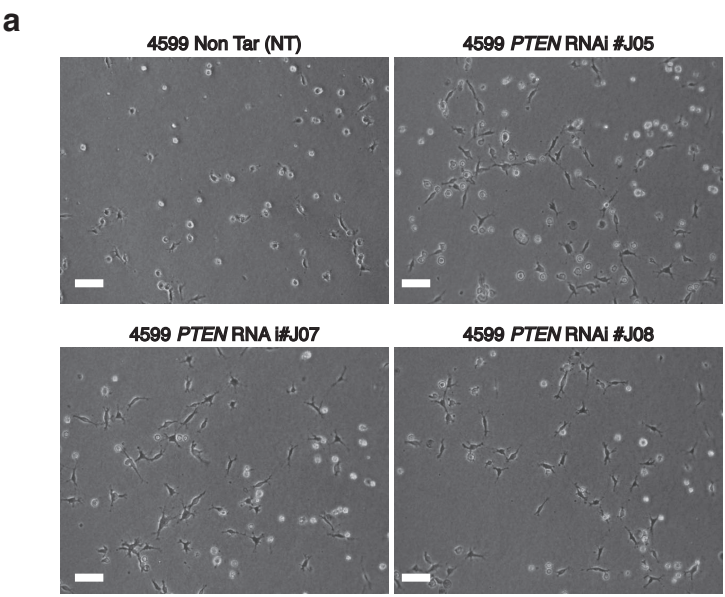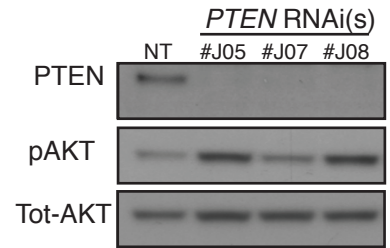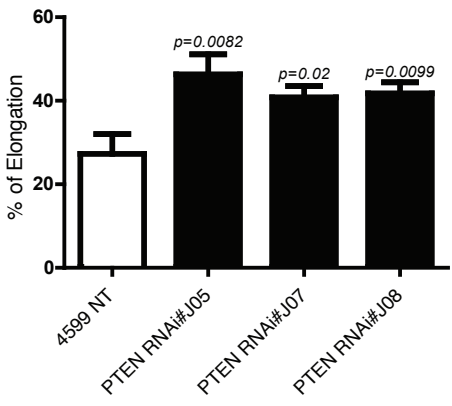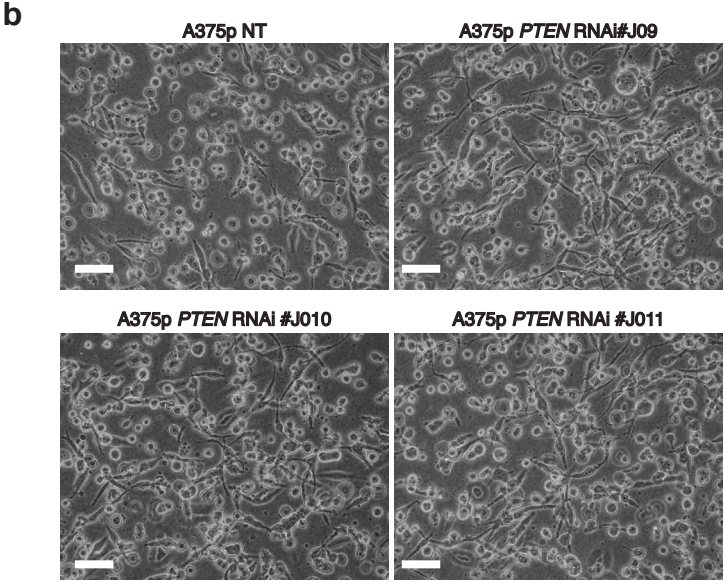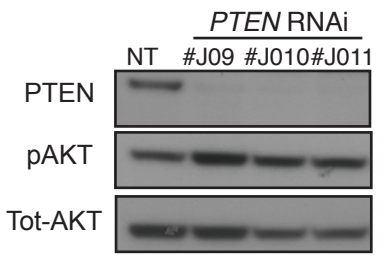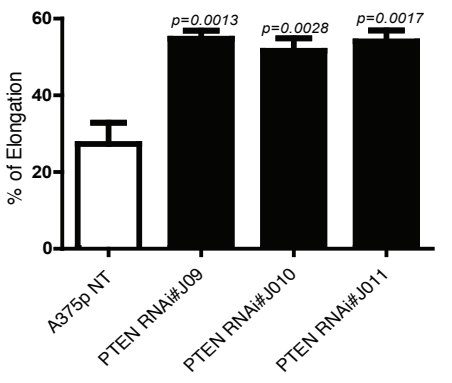

Supplement: NIHMS53734-supplement-6.pdf [file NIHMS53734-supplement-6.pdf]

# Figure S5 Yin

**a**

4599 (*PTEN*wt)

690Cl2(*PTEN*wt)

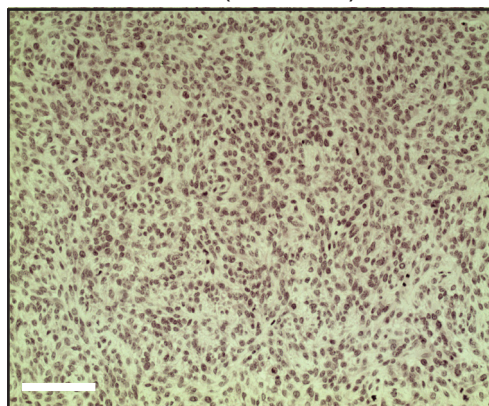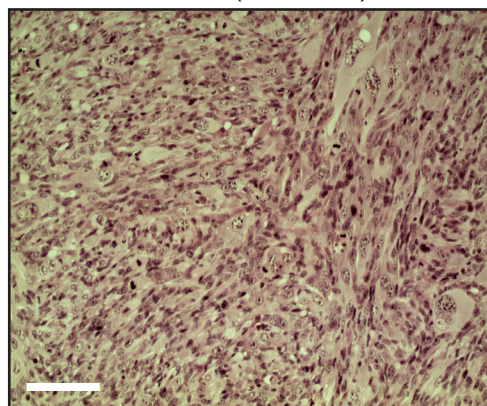

**b**

4599 NT

4599 sh*PTEN*#J04

4599 sh*PTEN*#J05

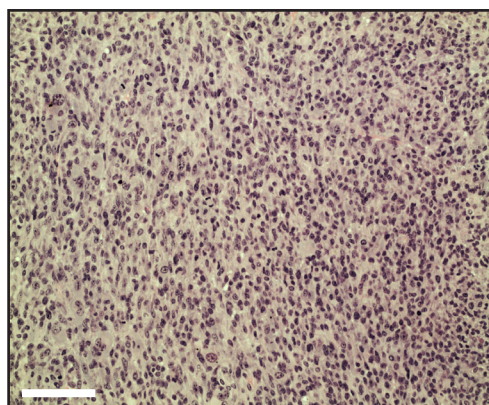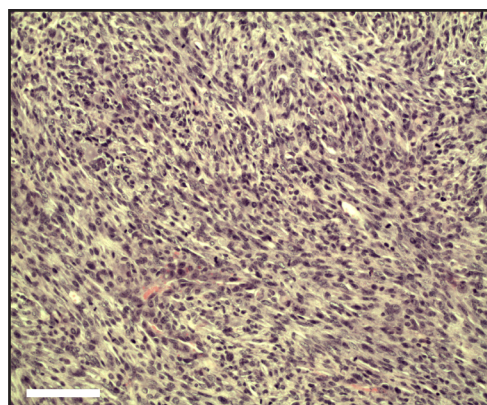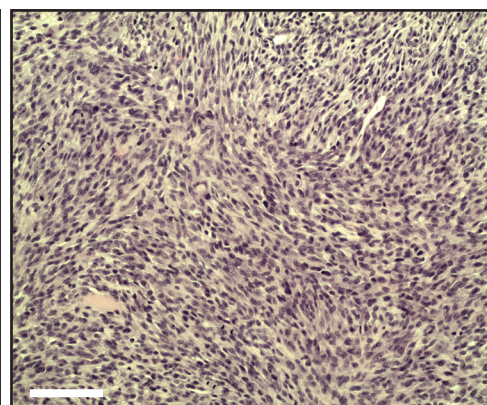

Supplement: NIHMS53734-supplement-7.pdf [file NIHMS53734-supplement-7.pdf]

Figure S6 Yin

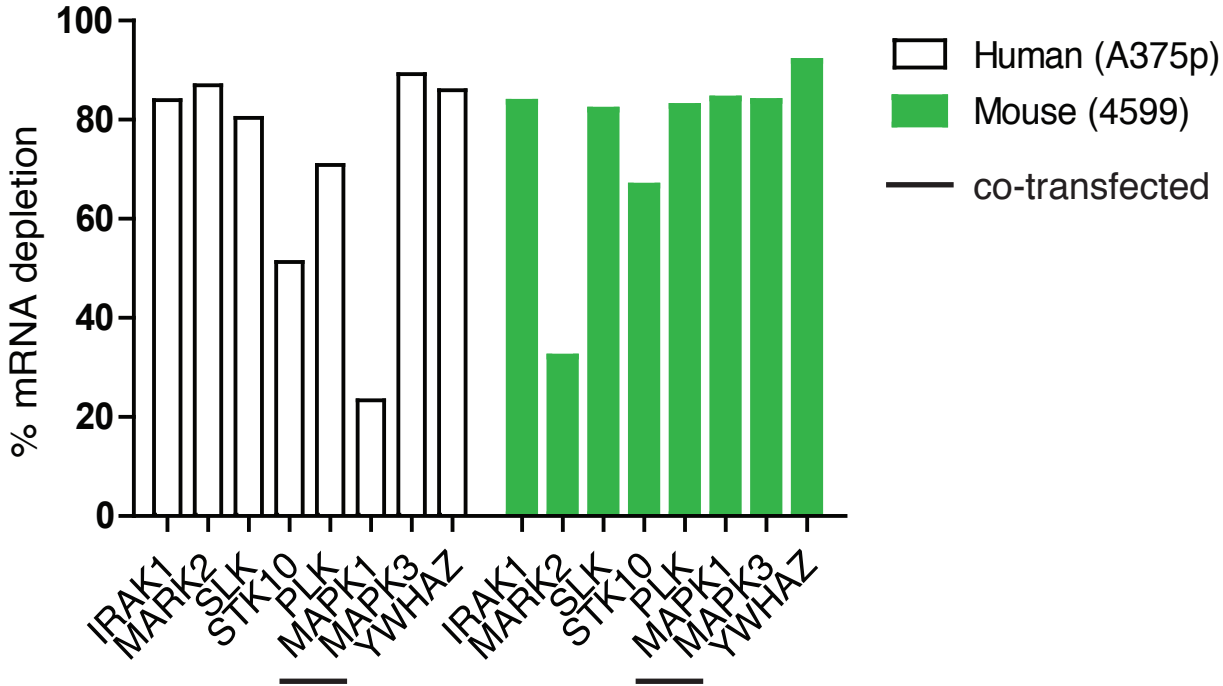

Supplement: NIHMS53734-supplement-8.pdf [file NIHMS53734-supplement-8.pdf]
